# Supplementary material
Source: PubMed Central journal article supplement (PMC6042122)
Supplement: pnas.1802192115.sapp.pdf [file pnas.1802192115.sapp.pdf]

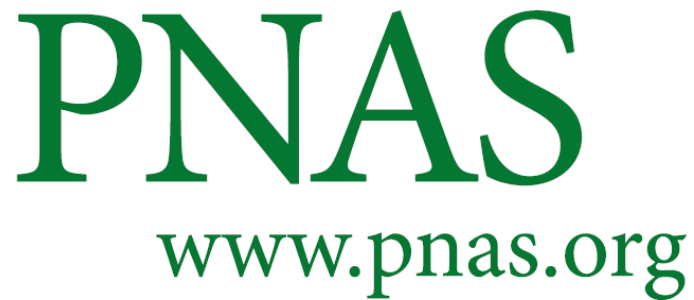

## Supplementary Information for

Structure and mutagenic analysis of the lipid II flippase MurJ from  
*Escherichia coli*

Sanduo Zheng, Lok-To Sham, Frederick A. Rubino, Kelly P. Brock, William P. Robins,  
John J. Mekalanos, Debora S. Marks, Thomas G. Bernhardt, Andrew C. Kruse

Correspondence to Andrew C. Kruse  
Email: [andrew\\_kruse@hms.harvard.edu](mailto:andrew_kruse@hms.harvard.edu)

**This PDF file includes:**

Figs. S1 to S2  
Tables S1 to S2

**Other supplementary materials for this manuscript include the following:**

Dataset S1

A

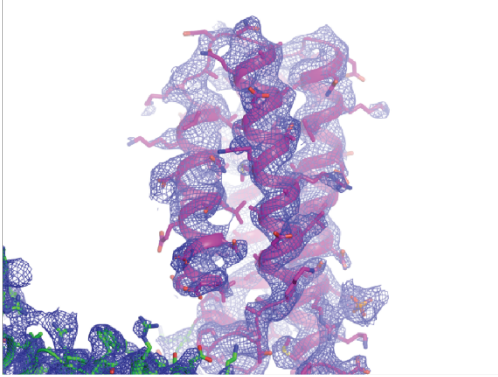

B

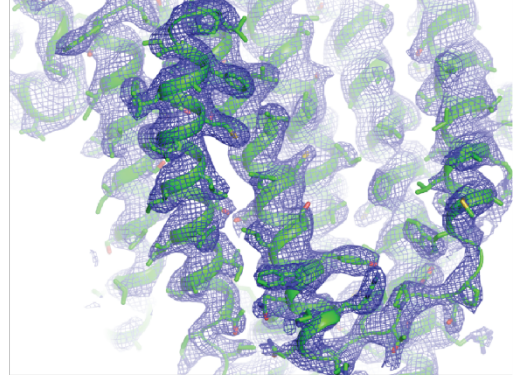

C

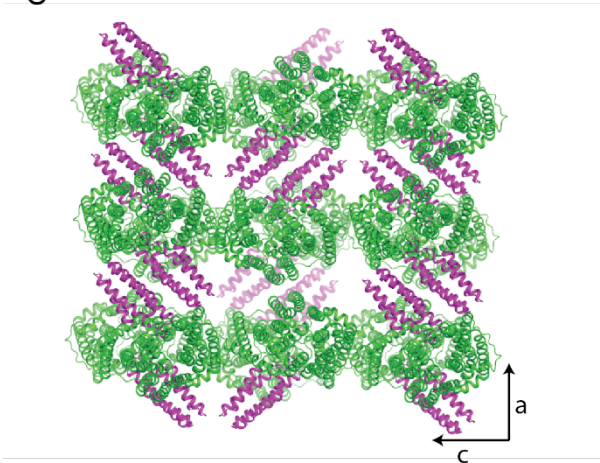

**Fig. S1. Structure determination of *E. coli* MurJ.**  $2F_o-F_c$  electron density map for BRIL (A) and MurJ (B) contoured at  $1.0 \sigma$ . (C) The crystal packing of BRIL-MurJ fusion protein is shown. BRIL and MurJ are colored in magenta and green respectively.

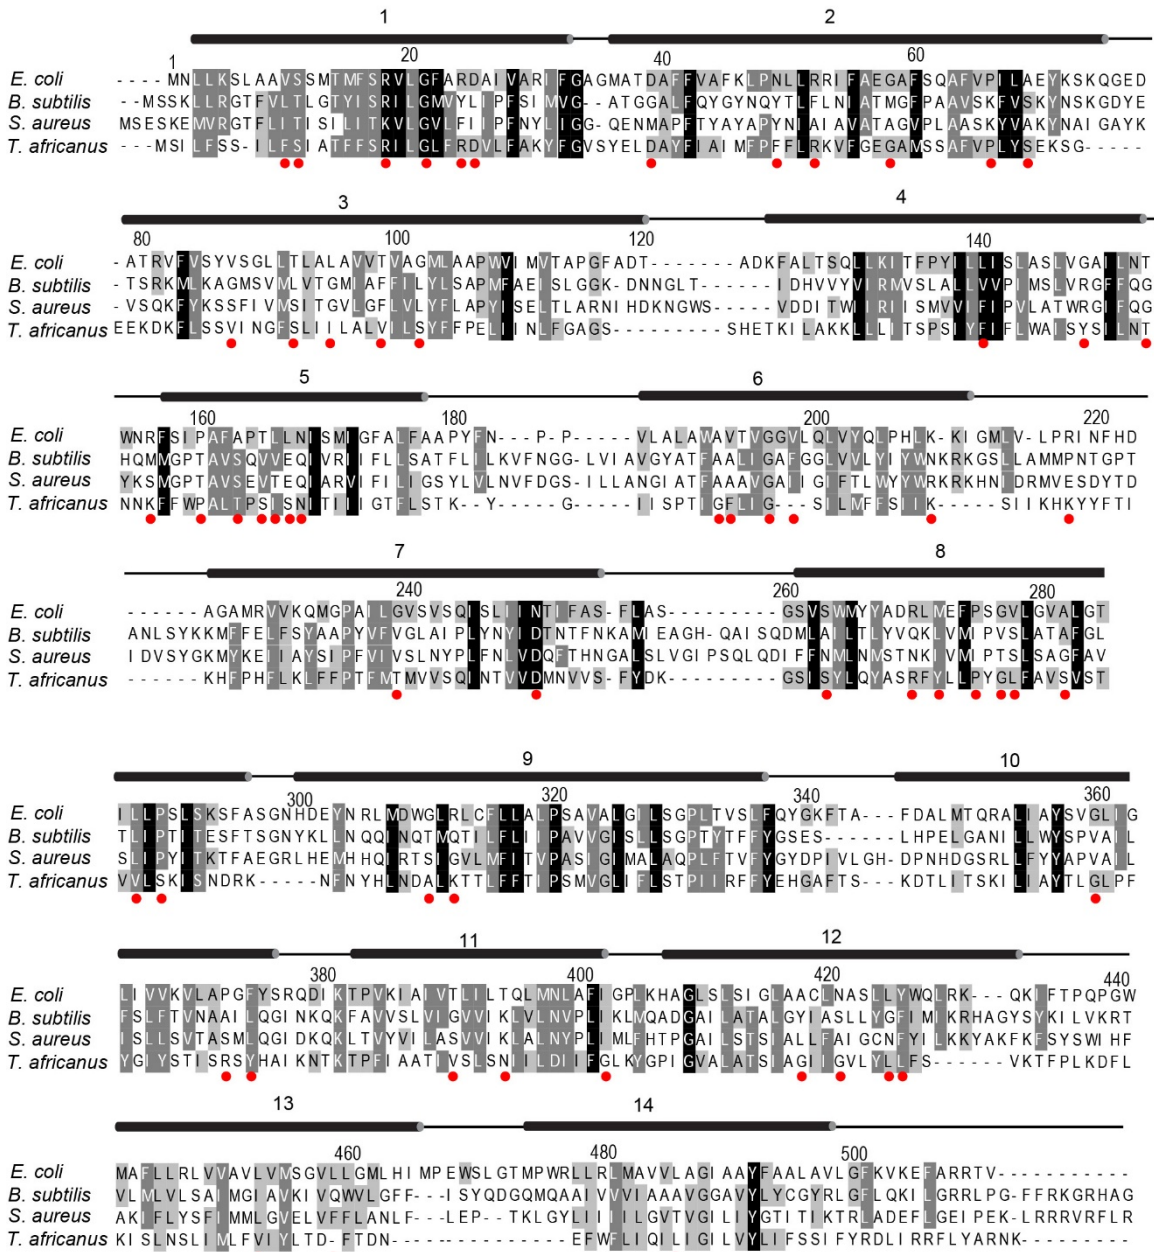

**Fig. S2. Sequence alignment of MurJ from both Gram-positive and Gram-negative bacteria.** 483 sequences retrieved from BLAST were used for alignment with *Escherichia coli*, *Bacillus subtilis*, *Staphylococcus aureus*, and *Thermosipho africanus* displayed here. Residues with more than 98%, 80% and 60% sequence similarity were shown in black, grey and light grey respectively. Secondary structure elements were shown above the alignment based on the crystal structure. The red circle below alignment denotes essential residues of MurJ in *E. coli* corresponding to **Figure 3**.

**Table S1. Crystallographic statistics****Data collection\***

|                               |                        |
|-------------------------------|------------------------|
| Wavelength (Å)                | 1.033                  |
| Space group                   | $C222_1$               |
| Number of crystals            | 5                      |
| Unit cell dimensions          |                        |
| $a, b, c$ (Å)                 | 113.9, 118.0, 128.0    |
| $\alpha, \beta, \gamma$ (°)   | 90, 90, 90             |
| Resolution (Å)                | 50 - 3.5 (3.58 - 3.50) |
| Completeness (%)              | 95.5 (95.0)            |
| $\langle I/\sigma(I) \rangle$ | 3.6 (0.7)              |
| CC <sub>1/2</sub> (%)         | 95.3 (21.1)            |
| Multiplicity                  | 2.7 (2.4)              |

**Refinement**

|                                          |                         |
|------------------------------------------|-------------------------|
| Resolution (Å)                           | 35.7 - 3.5 (3.85 - 3.5) |
| No. reflections                          | 10640                   |
| R <sub>work</sub> /R <sub>free</sub> (%) | 28.0 / 30.1             |
| No. atoms                                | 4608                    |
| Protein                                  | 4603                    |
| Solvent ions                             | 5                       |
| B factors (Å <sup>2</sup> )              | 74.8                    |
| RMS deviation                            |                         |
| Bond length (Å)                          | 0.003                   |
| Bond angles (°)                          | 0.740                   |
| Ramachandran statistics                  |                         |
| Favored                                  | 95.05%                  |
| Allowed                                  | 4.95%                   |
| Outliers                                 | 0                       |

\*Values in parentheses are for highest shell.

**Table S2. Summary of deleterious mutations identified by Mut-Seq.**

|      | <b>Residue</b>                                                  | <b>Substitution</b> |                                                                                                                                      | <b>Residue</b> | <b>Substitution</b>                                                                                          |
|------|-----------------------------------------------------------------|---------------------|--------------------------------------------------------------------------------------------------------------------------------------|----------------|--------------------------------------------------------------------------------------------------------------|
|      | <b>Group I:<br/>Buried residues likely required for folding</b> | V87                 |                                                                                                                                      | Asp            | <b>Group II:<br/>Residues that compose the extracellular gate and stabilize the inward-open conformation</b> |
| T92  |                                                                 | Arg                 | S263                                                                                                                                 | Tyr            |                                                                                                              |
| L95  |                                                                 | Arg                 |                                                                                                                                      |                |                                                                                                              |
| T99  |                                                                 | Arg                 |                                                                                                                                      |                |                                                                                                              |
| G102 |                                                                 | Arg                 |                                                                                                                                      |                |                                                                                                              |
| L140 |                                                                 | Arg                 |                                                                                                                                      |                |                                                                                                              |
| G148 |                                                                 | Arg                 |                                                                                                                                      |                |                                                                                                              |
| P160 |                                                                 | Arg                 | <b>Group III:<br/>Residues that likely compose the intracellular gate and stabilize the outward-open conformation</b>                | V10            | Gly                                                                                                          |
| A163 |                                                                 | Asp                 |                                                                                                                                      | S11            | Arg                                                                                                          |
| T165 |                                                                 | Lys, Arg            |                                                                                                                                      | P66            | Arg, Thr                                                                                                     |
| L166 |                                                                 | Arg                 |                                                                                                                                      | A69            | Pro                                                                                                          |
| L167 |                                                                 | Arg                 |                                                                                                                                      | T153           | Lys, Arg                                                                                                     |
| A192 |                                                                 | Asp                 |                                                                                                                                      | R156           | Pro                                                                                                          |
| V193 |                                                                 | Asp                 |                                                                                                                                      | R218           | Pro                                                                                                          |
| G196 |                                                                 | Asp                 |                                                                                                                                      | I286           | Phe, Asn                                                                                                     |
| V198 |                                                                 | Asp                 |                                                                                                                                      | P289           | Ala                                                                                                          |
| L208 |                                                                 | Arg                 |                                                                                                                                      | P372           | Arg                                                                                                          |
| G239 |                                                                 | Asp                 | <b>Group IV:<br/>Solvent-exposed residues located in the central cavity or extended groove, likely involved in substrate binding</b> | R18            | Leu, Pro                                                                                                     |
| N250 |                                                                 | Lys                 |                                                                                                                                      | G21            | Ala, Arg                                                                                                     |
| M272 |                                                                 | Lys                 |                                                                                                                                      | R24            | Gly, Gln                                                                                                     |
| P275 |                                                                 | Arg                 |                                                                                                                                      | D25            | Tyr, His                                                                                                     |
| V278 |                                                                 | Glu                 |                                                                                                                                      | N49            | Ile, Lys                                                                                                     |
| A282 |                                                                 | Glu                 |                                                                                                                                      | R52            | Cys, Pro                                                                                                     |
| L287 |                                                                 | Trp                 |                                                                                                                                      | G58            | Glu, Arg                                                                                                     |
| G310 |                                                                 | Arg                 |                                                                                                                                      | N168           | Lys                                                                                                          |
| G360 |                                                                 | Arg                 |                                                                                                                                      | R270           | Cys, Pro                                                                                                     |
| F374 |                                                                 | Val, Ile            |                                                                                                                                      | E273           | Val, Lys                                                                                                     |
| I402 |                                                                 | Ser                 |                                                                                                                                      | G277           | Val, Asp, Arg                                                                                                |
| A418 |                                                                 | Pro                 |                                                                                                                                      | R312           | Pro                                                                                                          |
| L425 |                                                                 | Arg                 |                                                                                                                                      | T390           | Lys, Arg                                                                                                     |
| Y426 |                                                                 | Asp                 |                                                                                                                                      | T394           | Lys, Arg                                                                                                     |
| L453 |                                                                 | Arg                 |                                                                                                                                      | N421           | Lys                                                                                                          |
| L459 |                                                                 | Pro, Arg            | L486                                                                                                                                 | Arg            |                                                                                                              |
